# $\gamma$ -Aminobutyric Acid Type A Receptor Subtypes and Circuit Connections in Midazolam-induced Amnesia, Sedation, and Hypnosis

Stuart A. Forman, M.D., Ph.D.

Midazolam is a benzodiazepine that at low doses is widely used in preprocedural care settings to assure amnesia and produce anxiolysis and sedation, while high doses are less frequently used to induce hypnosis (unconsciousness). Midazolam is also used to acutely suppress seizures. The molecular targets mediating these drug effects are  $\gamma$ -aminobutyric acid type A ( $GABA_A$ ) receptors in the central nervous system, pentameric ligand-gated chloride channels that, when activated, hyperpolarize neurons and suppress their activation. This is the vastly oversimplified story we teach medical students, omitting many detailed scientific discoveries and unanswered questions that make the story of benzodiazepines fascinating, multifaceted, and open-ended. Important questions include the following: What types of  $GABA_A$  receptors mediate the various neurobiologic effects of benzodiazepines? What are the relevant neural circuits mediating those effects? How are  $GABA_A$  receptor subtypes distributed in those circuits and associated glial cells? Can pharmacologically targeting benzodiazepine sites selectively treat neurologic disorders? A new piece of that story is introduced in this issue of *ANESTHESIOLOGY* in an article by Puig-Bosch *et al.*,<sup>1</sup> emerging from an international research collaboration. The elegant experiments described by Puig-Bosch *et al.* use tissue from transgenic animals containing mutations that eliminate midazolam sensitivity to explore the role of specific  $GABA_A$  receptor subunits in neural circuits involved in amnesia, sedation, and hypnosis. The major findings, telegraphed in the title, implicate  $\alpha 1$ -containing receptors in

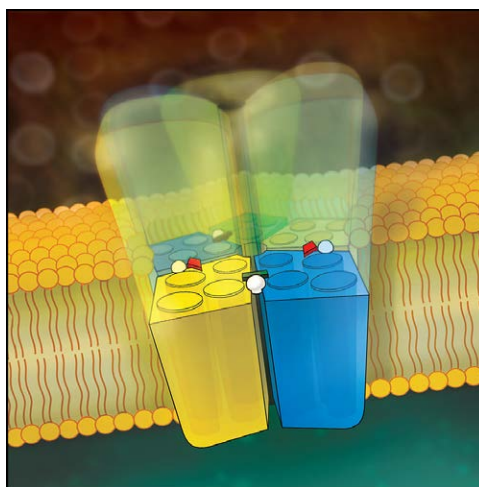

**“...investigational compounds that selectively target a growing set of  $GABA_A$  receptor allosteric modulator sites may evolve into future drugs...”**

midazolam effects on the neural circuits that were studied.

These experiments are based on knowledge gained from decades of research into benzodiazepine molecular sites of action and neuronal circuits, using an ever-growing set of research tools. The key experimental approaches scale from molecules to animals, spanning genetics, protein structural studies, electrophysiology, neuroanatomy, pharmacology, and behavior. The molecular pharmacology of benzodiazepines helps us understand the strategy used by Puig-Bosch *et al.* Nineteen  $GABA_A$  receptor subunits are encoded in the human genome:  $\alpha 1$  to  $\alpha 6$ ,  $\beta 1$  to  $\beta 3$ ,  $\gamma 1$  to  $\gamma 3$ ,  $\delta$ ,  $\epsilon$ ,  $\Phi$ ,  $\pi$  and  $\rho 1$  to  $\rho 3$ .<sup>2</sup> Among many thousands of possible pentameric subunit combinations, only a few dozen exist in neurons and glial cells in the central nervous system. Classical benzodiazepines like midazolam target typical postsynaptic receptors that contain two  $\alpha$  subunits, two  $\beta$  subunits, and a  $\gamma$  subunit, arranged as depicted in figure 1. This configuration was first proposed based on functional electrophysiology studies of genetically engineered subunit assemblies that constrained their arrangement, and later confirmed with cryo-electron microscopy.<sup>3,4</sup> Photolabeling and cryo-electron microscopy locate benzodiazepine binding within the extracellular interface between the  $\alpha$  and  $\gamma$  subunits, near a histidine at position 102 in  $\alpha 1$ .<sup>5,6</sup> These sites are structural homologs of the extracellular pockets where  $\gamma$ -aminobutyric acid binds between  $\beta$  and  $\alpha$  subunits, paralleling evidence that benzodiazepines act as allosteric coagonists.<sup>7</sup> Electrophysiologic studies of  $GABA_A$  receptors containing different subunits

Image: A. Johnson, Vivo Visuals Studio.

This editorial accompanies the article on p. 954.

Accepted for publication March 30, 2022.

Stuart A. Forman, M.D., Ph.D.: Department of Anesthesia, Critical Care & Pain Medicine, Massachusetts General Hospital, Boston, Massachusetts.

Copyright © 2022, the American Society of Anesthesiologists. All Rights Reserved. *Anesthesiology* 2022; 136:880–2. DOI: 10.1097/ALN.0000000000004234

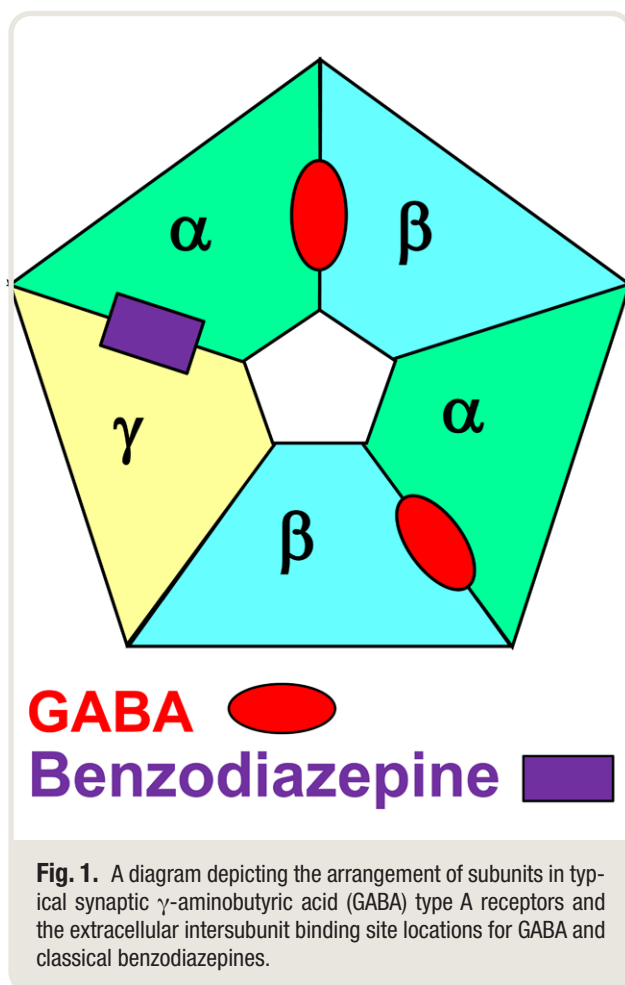

revealed that classical benzodiazepines enhance activation when the  $\alpha 1$ ,  $\alpha 2$ ,  $\alpha 3$ , and  $\alpha 5$  subunits, but not  $\alpha 4$  or  $\alpha 6$ , are included. The benzodiazepine-sensitive  $\alpha$  subunits all contain histidines at positions homologous to  $\alpha 1H102$ , while  $\alpha 4$  and  $\alpha 6$  contain arginine residues. Mutating these histidines in benzodiazepine-sensitive  $\alpha$  subunits to arginines renders receptors benzodiazepine-insensitive.<sup>8</sup>

Members of the research collaborative created “knock-in” transgenic lines of mice with histidine-to-arginine mutations in each of the four benzodiazepine-sensitive  $\alpha$  subunit types:  $\alpha 1$ -KI,  $\alpha 2$ -KI,  $\alpha 3$ -KI, and  $\alpha 5$ -KI. By cross-breeding these lines, they also created triple-mutant lines of mice with only one benzodiazepine-sensitive  $\alpha$  subtype. Thus, in  $\alpha 1/2/3$ -KI,  $\alpha 1/3/5$ -KI, and  $\alpha 2/3/5$ -KI lines, respectively, benzodiazepines affect only  $\alpha 5$ ,  $\alpha 2$ , or  $\alpha 1$  receptors. From an interpretive standpoint, these knock-in lines are ideal for establishing whether a particular  $\alpha$  subtype is both necessary and sufficient for a particular outcome. In that case, the single subtype knock-in should eliminate the benzodiazepine effect, while the complementary triple knock-in should retain benzodiazepine sensitivity.

These transgenic mice have previously been studied using various behavioral tests for distinct benzodiazepine effects, indicating that  $\alpha 1$  receptors contribute to sedation, amnesia, and seizure protection, while  $\alpha 2$  receptors mediate anxiolysis and muscle relaxation.<sup>9</sup> Other experiments support a significant role for  $\alpha 5$  subunits in learning and memory as well as amnesia caused by benzodiazepines or etomidate.<sup>10</sup> Indeed,  $\alpha 5$  is highly expressed in the hippocampus, which is part of the neural circuit responsible for memory formation. However,  $\alpha 5$  receptors often contain  $\delta$  subunits that are associated with increased  $\gamma$ -aminobutyric acid sensitivity, lack of benzodiazepine sensitivity, and extrasynaptic localization on neurons.<sup>11</sup> Thus, it remains uncertain which  $\alpha$  subunit(s) are important for benzodiazepine-induced amnesia.

To bridge murine behavior with relevant neural circuits, Puig-Bosch *et al.* studied electrophysiologic effects of midazolam exposure in brain slices from wild-type and transgenic mice. The phenomenon known as long-term potentiation in hippocampal CA1 regions is an established correlate of memory. Long-term potentiation in hippocampal slices was observed as prolonged enhancement of field potentials in response to low-frequency stimulation after a brief high-frequency “training” activation of Schaffer collaterals in another part of the hippocampal circuit. For correlates of sedation (low-dose midazolam) and hypnosis (high-dose midazolam), decay rates of inhibitory postsynaptic currents were measured in voltage-clamped neurons in both hippocampal slices and cultured cortical slices. Here, the effect of midazolam in wild-type neurons is to reversibly prolong the decay of inhibitory postsynaptic currents, which are mediated by synaptic GABA<sub>A</sub> receptors. The results implicate  $\alpha 1$  receptors, echoing previous behavioral studies, but also add a twist in the long-term potentiation outcomes, suggesting a novel model involving an interaction between other types of hippocampal GABA<sub>A</sub> receptors on different neurons in the circuit. Future studies should test this hypothesis. The postsynaptic current decay studies also need follow-up to further explore the roles of non- $\alpha 1$  receptors.

*In vitro* neural circuit experiments have both advantages and disadvantages relative to studies in live animals. A major advantage is that the experiments can be done with precise control of midazolam concentrations in fluid bathing the brain slices. In contrast, experiments in live mice cannot be done under conditions of steady-state benzodiazepine concentrations in the central nervous system. Pharmacokinetic factors (absorption, distribution, metabolism, and excretion) result in continuously varying concentrations after drug administration, and midazolam, a short-acting benzodiazepine, is particularly challenging. Limitations to these approaches include the high likelihood that other brain regions contribute to the behavioral effects of interest and that the relevant midazolam concentrations associated with various behavioral effects are uncertain.

The results of Puig-Bosch *et al.* represent scientific progress toward mapping GABA<sub>A</sub> receptors in neurons, glia, and neural circuits, connecting physiology and pharmacology to brain function and dysfunction.<sup>11</sup> Such work is of fundamental importance for understanding neurophysiology and relevant pharmacology. From a more practical perspective, GABA<sub>A</sub> receptors can be viewed as an important set of drug targets that play key roles not just in perioperative medicine but also in various neurologic disorders. Benzodiazepines, other benzodiazepine-site modulators, and investigational compounds that selectively target a growing set of GABA<sub>A</sub> receptor allosteric modulator sites may evolve into future drugs that provide subtle modulation at specific receptor subtypes. Examples include non-sedating non-amnestic anxiolytics and cognitive enhancers. Thus, this unfolding research story may influence the future of medicine.

### Research Support

Support was provided by the National Institutes of Health (Bethesda, Maryland; R35 GM141951) and the Wiener-Kronish Family Endowed Chair for Research and Teaching in Anesthesia at Massachusetts General Hospital (Boston, Massachusetts).

### Competing Interests

Dr. Forman serves as Senior Editor for the Preclinical Pharmacology section of *Anesthesia & Analgesia*. The author is not supported by, nor maintains any financial interest in, any commercial activity that may be associated with the topic of this article.

### Correspondence

Address correspondence to Dr. Forman: saforman@mgh.harvard.edu

### References

1. Puig-Bosch X, Bielecki S, Zeilhofer HU, Rudolph U, Antkowiak B, Rammes G: Midazolam at low nanomolar concentrations affects long-term potentiation and synaptic transmission predominantly *via* the  $\alpha_1$ - $\gamma$ -aminobutyric acid type A receptor subunit in mice. *ANESTHESIOLOGY* 2022; 136:954–69
2. Sieghart W, Savic MM: International Union of Basic and Clinical Pharmacology. CVI: GABA<sub>A</sub> receptor subtype- and function-selective ligands: Key issues in translation to humans. *Pharmacol Rev* 2018; 70:836–87
3. Baumann SW, Baur R, Sigel E: Subunit arrangement of gamma-aminobutyric acid type A receptors. *J Biol Chem* 2001; 276:36275–80
4. Lavery D, Desai R, Uchanski T, Masiulis S, Stec WJ, Malinauskas T, Zivanov J, Pardon E, Steyaert J, Miller KW, Aricescu AR: Cryo-EM structure of the human  $\alpha 1\beta 3\gamma 2$  GABAA receptor in a lipid bilayer. *Nature* 2019; 565:516–20
5. Kim JJ, Gharpure A, Teng J, Zhuang Y, Howard RJ, Zhu S, Novello CM, Walsh RM Jr, Lindahl E, Hibbs RE: Shared structural mechanisms of general anaesthetics and benzodiazepines. *Nature* 2020; 585:303–8
6. Duncalfe LL, Carpenter MR, Smillie LB, Martin IL, Dunn SM: The major site of photoaffinity labeling of the gamma-aminobutyric acid type A receptor by [3H] flunitrazepam is histidine 102 of the alpha subunit. *J Biol Chem* 1996; 271:9209–14
7. Rüschi D, Forman SA: Classic benzodiazepines modulate the open-close equilibrium in  $\alpha 1\beta 2\gamma$  gamma-aminobutyric acid type A receptors. *ANESTHESIOLOGY* 2005; 102:783–92
8. Benson JA, Löw K, Keist R, Mohler H, Rudolph U: Pharmacology of recombinant gamma-aminobutyric acid A receptors rendered diazepam-insensitive by point-mutated alpha-subunits. *FEBS Lett* 1998; 431:400–4
9. Möhler H, Fritschy JM, Rudolph U: A new benzodiazepine pharmacology. *J Pharmacol Exp Ther* 2002; 300:2–8
10. Rudolph U, Möhler H: Analysis of GABAA receptor function and dissection of the pharmacology of benzodiazepines and general anesthetics through mouse genetics. *Annu Rev Pharmacol Toxicol* 2004; 44:475–98
11. Engin E, Benham RS, Rudolph U: An emerging circuit pharmacology of GABAA receptors. *Trends Pharmacol Sci* 2018; 39:710–32
